# Supplementary material for: Long-term safety and efficacy of teriflunomide: Nine-year follow-up of the randomized TEMSO study
Source: PubMed Central journal article supplement — Neurology. 2016 Mar 8;86(10):920–30. doi: 10.1212/WNL.0000000000002441 (PMC4782117; doi:10.1212/wnl.0000000000002441), 2016-03-08

**Figure e-1. Discontinuations by extension study year (Safety population)**

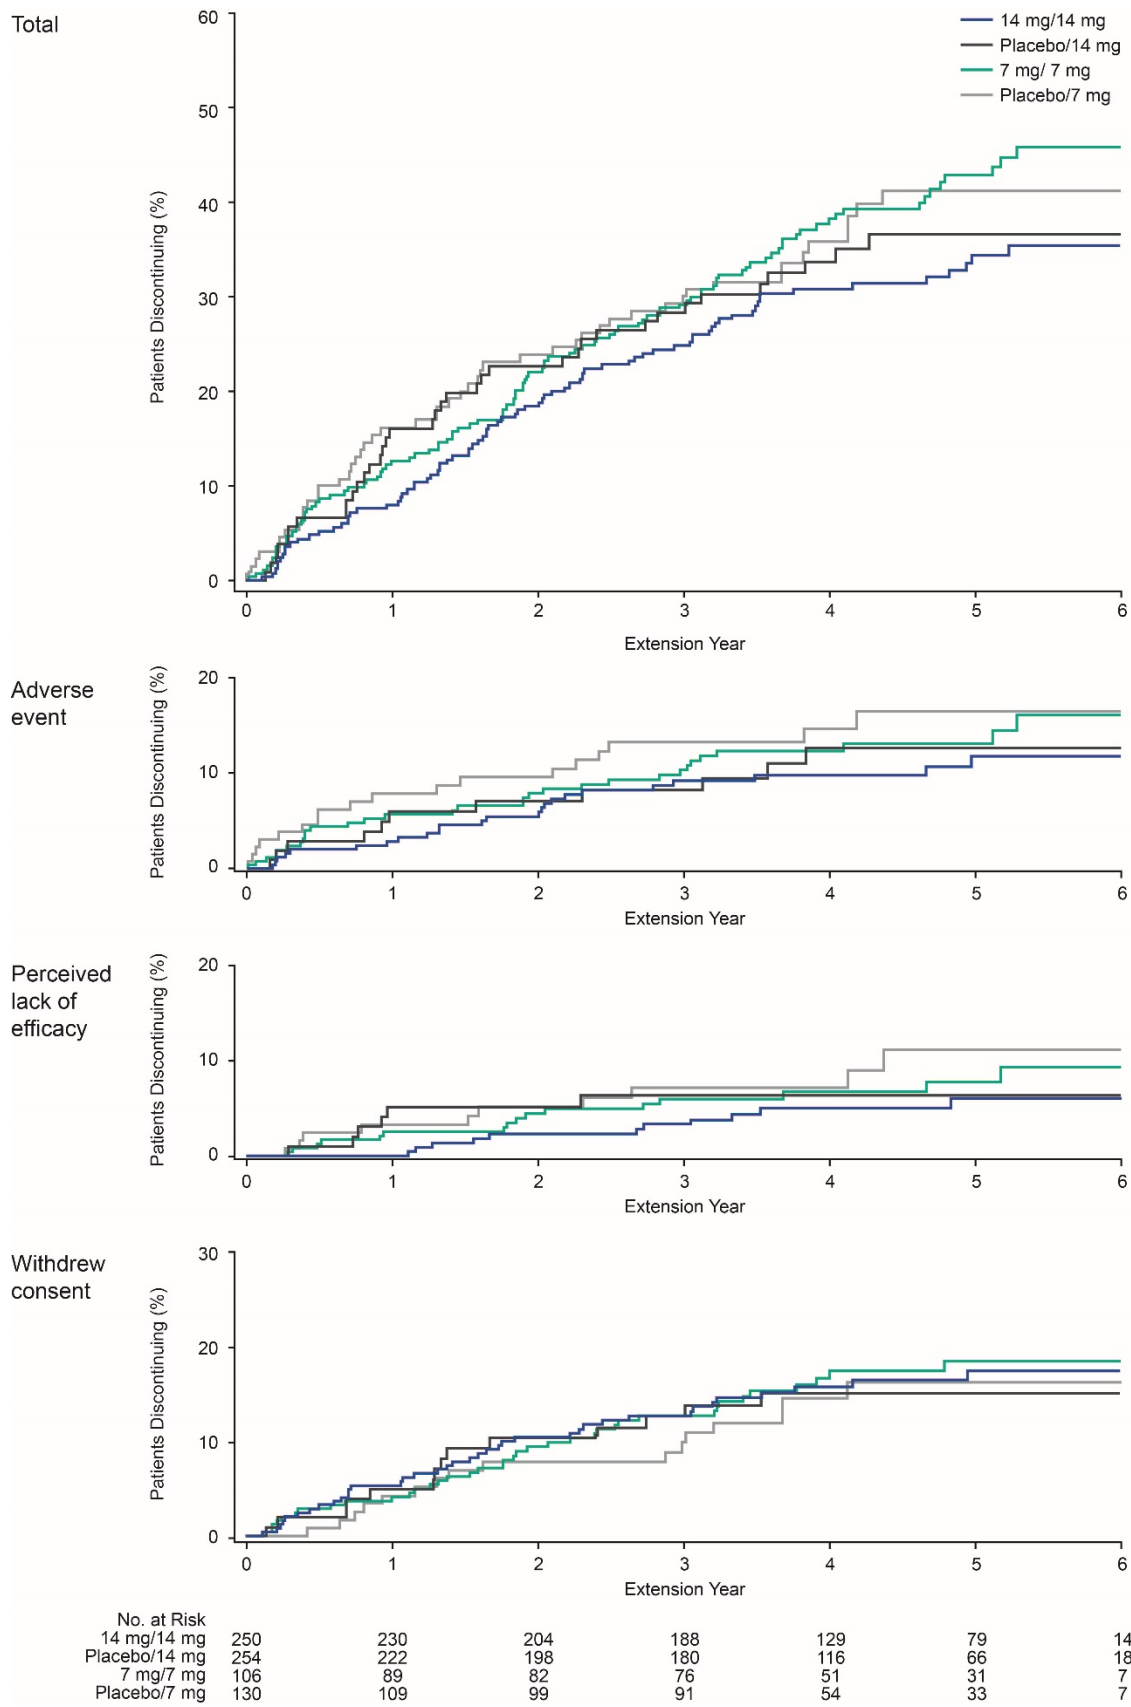

**Figure e-2A. White blood cell and neutrophil counts over time, Core and Extension studies (Safety population)**

**i. White Blood Cells**

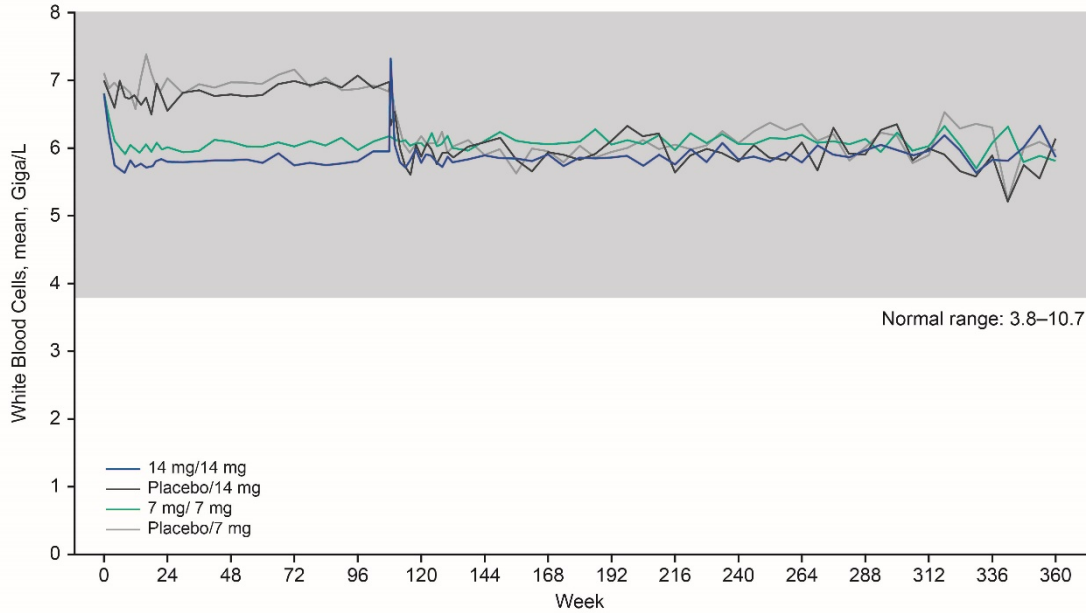

| No. of patients | 0   | 24  | 48  | 72  | 96  | 120 | 144 | 168 | 192 | 216 | 240 | 264 | 288 | 312 | 336 | 360 |
|-----------------|-----|-----|-----|-----|-----|-----|-----|-----|-----|-----|-----|-----|-----|-----|-----|-----|
| 14 mg/14 mg     | 250 | 243 | 243 | 242 | 236 | 209 | 221 | 213 | 205 | 188 | 182 | 174 | 151 | 114 | 97  | 71  |
| Placebo/14 mg   | 105 | 103 | 102 | 102 | 102 | 93  | 95  | 84  | 78  | 75  | 76  | 76  | 59  | 44  | 34  | 29  |
| 7 mg/7 mg       | 254 | 245 | 247 | 248 | 235 | 220 | 231 | 211 | 202 | 181 | 184 | 174 | 136 | 106 | 87  | 59  |
| Placebo/7 mg    | 130 | 127 | 126 | 128 | 127 | 117 | 111 | 104 | 97  | 92  | 90  | 83  | 66  | 43  | 39  | 33  |

**ii. Neutrophils**

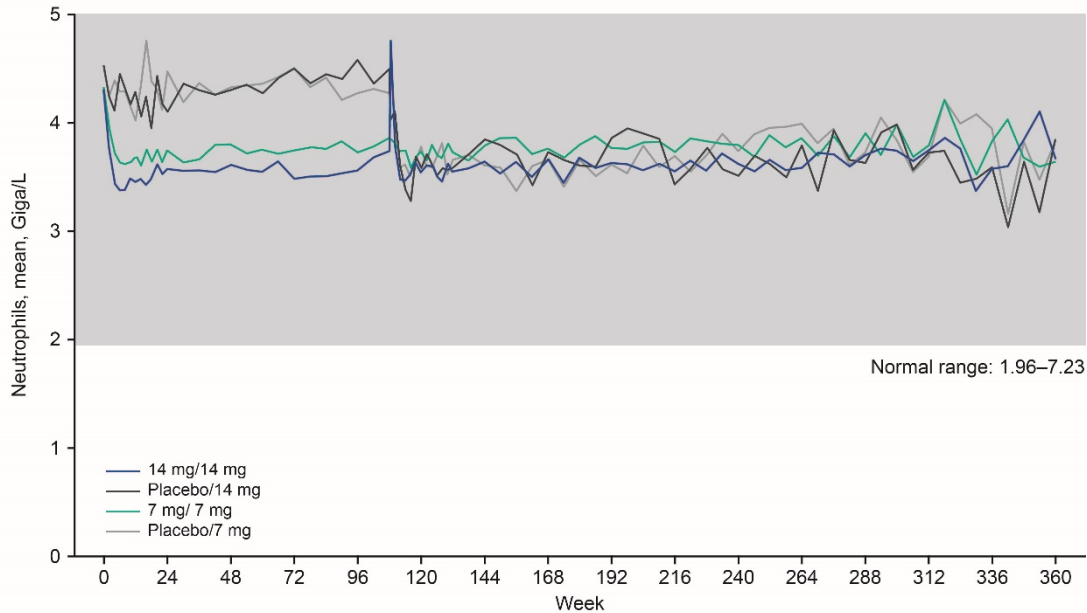

| No. of patients | 0   | 24  | 48  | 72  | 96  | 120 | 144 | 168 | 192 | 216 | 240 | 264 | 288 | 312 | 336 | 360 |
|-----------------|-----|-----|-----|-----|-----|-----|-----|-----|-----|-----|-----|-----|-----|-----|-----|-----|
| 14 mg/14 mg     | 250 | 243 | 243 | 242 | 236 | 209 | 220 | 213 | 205 | 188 | 181 | 174 | 151 | 114 | 97  | 71  |
| Placebo/14 mg   | 105 | 103 | 102 | 101 | 102 | 93  | 95  | 84  | 78  | 75  | 76  | 76  | 59  | 44  | 34  | 29  |
| 7 mg/7 mg       | 254 | 245 | 246 | 247 | 235 | 220 | 231 | 211 | 202 | 181 | 184 | 174 | 136 | 106 | 87  | 59  |
| Placebo/7 mg    | 130 | 127 | 126 | 128 | 127 | 117 | 111 | 104 | 97  | 92  | 90  | 83  | 66  | 43  | 39  | 33  |

**Figure e-2B. Neutrophil counts over time, Core and Extension studies (Patients who discontinued treatment for Hematological Adverse Events)**

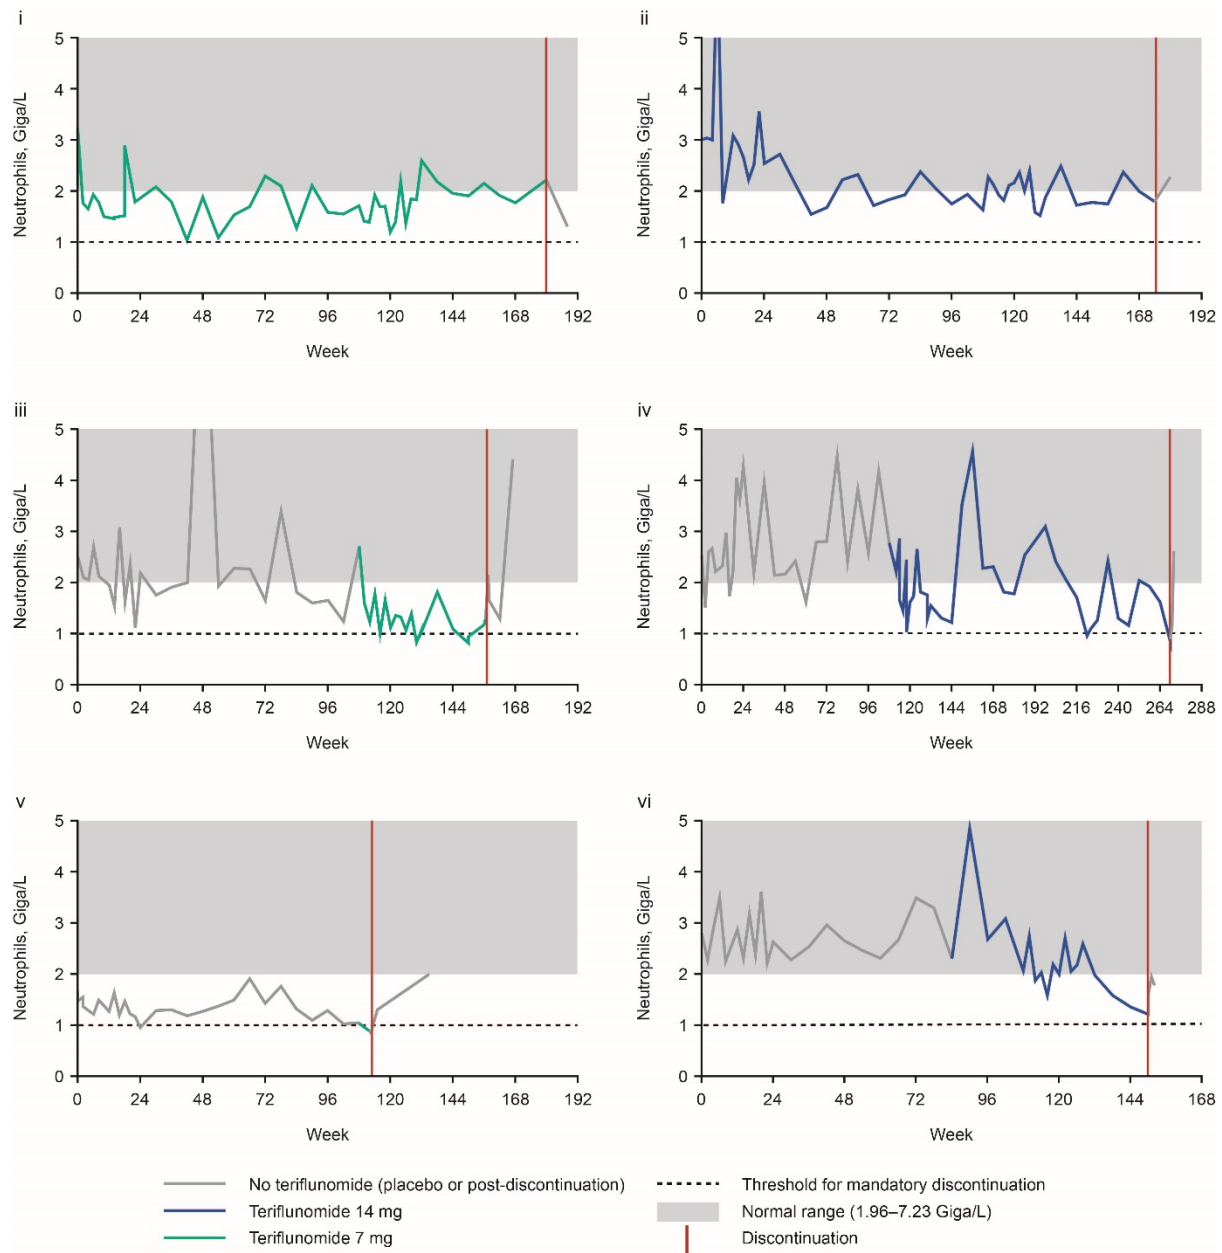

Supplement: supp_WNL.0000000000002441_Figures.pdf [file supp_WNL.0000000000002441_Figures.pdf]
